# Supplementary material for: Synthesis, characterization, electrochemical and photophysical properties of elbow-shaped trinuclear Ru(ii) complexes, building blocks for novel supramolecular constructions
Source: Royal Society of Chemistry journal article supplement (doi:10.1039/b618645a), 2007-01-01

**S1** : Cyclic voltammety in reduction of complex **1** in acetonitrile, case 1. Sometimes, the reduction behaviour in Fig. S2 (case 2) is also observed.

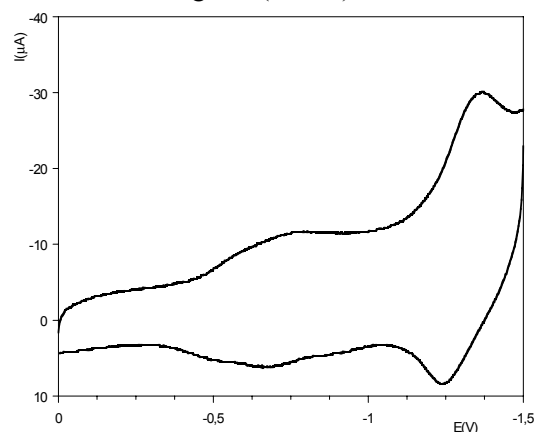

**S2** : Cyclic voltammety in reduction of complex **1** in acetonitrile, case 2.

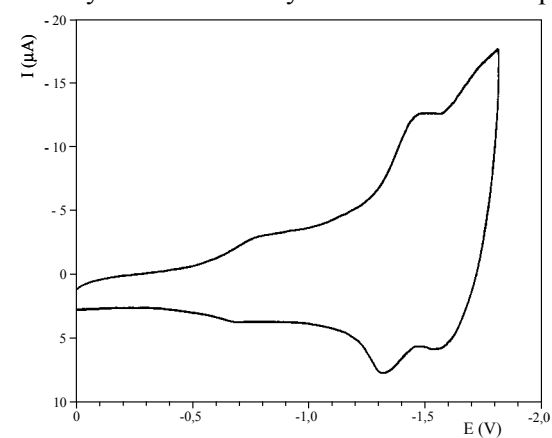

**S3** : Absorption spectrum of complex **1** in acetonitrile

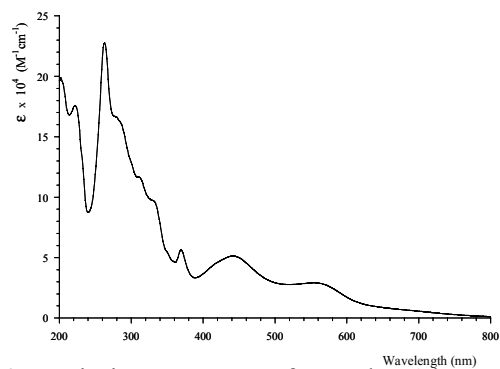

**S4** : Emission spectrum of complex **1** in acetonitrile (excitation at 450 nm)

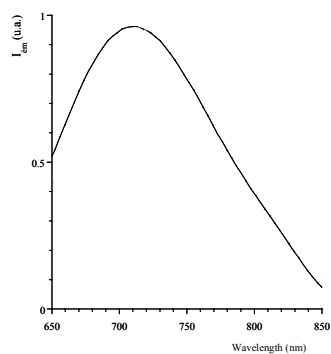

Supplement: b618645a.pdf [file b618645a.pdf]
